# Supplementary material for: Efficacy of a Communication-Priming Intervention on Documented Goals-of-Care Discussions in Hospitalized Patients With Serious Illness: A Randomized Clinical Trial
Source: PubMed Central journal article supplement (PMC8976242; doi:10.1001/jamanetworkopen.2022.5088), 2022-04-01
Supplement: jamanetwopen-e225088-s001.pdf [file jamanetwopen-e225088-s001.pdf]

## Study Protocol

### Title: Program to Improve Communication about Serious Illness – A Pilot Trial

Principal Investigator: J. Randall Curtis, MD, MPH

Co-Principal Investigator: Ruth A. Engelberg, PhD

Cambia Palliative Care Center of Excellence  
University of Washington, Seattle WA

#### Outline

#### Page

|                                           |   |
|-------------------------------------------|---|
| 1) Brief Overview                         | 2 |
| 2) Specific Aims                          | 2 |
| 3) Research Plan                          | 3 |
| a) Background and significance            | 3 |
| b) Innovation                             | 3 |
| c) Research design and methods            | 4 |
| i) Overview                               |   |
| ii) Setting                               |   |
| iii) Patient population                   |   |
| iv) Study design                          |   |
| v) Intervention                           |   |
| vi) Comparison group                      |   |
| vii) Major outcomes                       |   |
| viii) Additional outcomes                 |   |
| ix) Variables describing participants     |   |
| x) Quantitative data collection           |   |
| d) Aim specific statistical analysis plan | 7 |
| e) Sample size considerations             | 7 |
| f) Data management and quality control    | 8 |
| g) Protocol modifications                 | 8 |
| h) Anticipated limitations                | 8 |
| i) Anticipated findings                   | 9 |
| 4) References                             | 9 |

39  
40  
41  
42  
43  
44  
45  
46  
47  
48  
49  
50  
51  
52  
53  
54  
55  
56  
57  
58  
59  
60  
61  
62  
63  
64  
65  
66  
67  
68  
69  
70  
71  
72  
73  
74  
75  
76  
77  
78  
79  
80  
81  
82  
83  
84  
85  
86  
87  
88  
89  
90  
91  
92

## 1. Brief Overview

Goals-of-care communication represents one of the most important aspects of palliative care, yet remains a major shortcoming in our current healthcare system.<sup>1-5</sup> Electronic health records (EHR) provide a key opportunity to identify many patients who would benefit from goals-of-care discussions, yet few successful interventions have used the EHR to identify patients and promote goals-of-care communication for patients with serious illness. This gap was highlighted in the recent “Research Agenda for Communication between Healthcare Professionals and Patients with Serious Illness”.<sup>6</sup>

This pilot study builds on two of our most successful programs, one based in quality improvement and the other in research. First, we implemented a palliative care quality metrics program within a large multi-hospital system using the EHR to identify patients with serious illness and assess the quality of palliative care they received.<sup>7-10</sup> In this program, we are using natural language processing and machine learning (NLP/ML) to identify EHR documentation of goals-of-care discussions.<sup>7</sup> Second, we recently completed a randomized trial that successfully prompted outpatient clinicians to complete goals-of-care discussions with patients with serious illness using our “Jumpstart” intervention. Jumpstart is a “pre-conversation” communication-priming intervention that provides patient-specific information about preferences for communication and care (obtained from patient surveys), as well as tips to improve this communication, in a one-page form initially developed for a randomized trial in the Veterans Affairs system.<sup>11</sup> This form is delivered to patients (to prepare them to talk with clinicians) and clinicians (to provide guidance for goals-of-care communication). In our most recent trial, the intervention increased goals-of-care discussions at a routine outpatient visit from 31% to 75% ( $p < 0.001$ ) and increased patient-assessed quality of communication ( $p < 0.001$ ).<sup>2,12</sup> However, these interventions relied on manual review of the EHR for identification of eligible patients and did not use the EHR to implement the intervention, which limits scalability and dissemination.

In this pilot study, we use automated EHR information to identify our population of interest: hospitalized patients with serious illness (encompassing multiple acute and chronic illnesses) who do not have EHR documentation of a goals-of-care discussion. We will then conduct a pilot randomized trial of our Jumpstart intervention that provides patient-specific information to clinicians, patients, and family members to prompt and guide goals-of-care discussions. The intervention was informed by Vitaltalk ([www.vitaltalk.org](http://www.vitaltalk.org)) and we strive to accomplish 3 specific aims.

## 2. Specific Aims:

**Specific Aim 1:** Conduct a pilot randomized trial to evaluate *feasibility* and *acceptability* of using the EHR to: 1) identify eligible patients; and 2) implement the intervention in the inpatient setting. We will randomize patients to intervention ( $n=75$ ) or usual care ( $n=75$ ).

**Hypotheses:** We will successfully identify and recruit 150 eligible patients. We will implement the intervention with participation by 80% or more of enrolled patients. Patients, family, and clinicians will endorse the intervention as acceptable.

**Specific Aim 2:** Evaluate the *efficacy* of the intervention for changing processes of care with the primary outcome for this pilot trial being EHR documentation of a goals-of-care discussion. We chose this as the primary outcome to provide support for future funding applications. We will also assess exploratory outcomes to ensure feasibility of outcome assessment including: quality of communication; patients’ palliative care needs; patient and family symptoms of anxiety and depression; and patient and family reports of goal-concordant care.

**Hypothesis:** The intervention will be associated with a significant increase in EHR documentation of goals-of-care discussions and we will successfully collect data for the other outcomes.

**Specific Aim 3:** Conduct interviews with 30 trial participants from the intervention group (including patients, family members, and clinicians) to identify *barriers and facilitators to the intervention’s implementation* in a future trial and into clinical practice.

**Anticipated findings:** We will identify implementation barriers and facilitators to guide future trials.

### 3. Research Plan

#### a. Background and Significance

People near the end of life often receive care they would not choose.<sup>13,14</sup> A recent report from the Institute of Medicine documents these discrepancies in care and identifies advance care planning and goals-of-care discussions as a primary mechanism for addressing them.<sup>13</sup> This type of communication is a focus for improvement for two key reasons: 1) clinicians frequently do not have goals-of-care discussions with their patients until very late in the illness;<sup>1-5</sup> and 2) when these discussions occur, they are associated with improved quality of care and patient- and family-centered outcomes including increased quality of life and fewer intensive treatments at the end of life.<sup>1,15-17</sup>

Goals-of-care discussion should start in the outpatient setting when patients are well enough to participate, in order to inform “in the moment” clinical decisions.<sup>18,19</sup> For hospitalized patients with chronic illness, a key component of high quality care includes goals-of-care discussions conducted early during a hospital stay that build upon prior discussions and identify how patients’ goals of care should inform current care plans.<sup>3,19,20</sup> These early hospital discussions are also supported by the National Quality Forum (NQF).<sup>21</sup> **However, despite their key importance to a large number of patients, these hospital goals-of-care discussions often do not occur.**<sup>3,22</sup>

The recent research agenda in *Annals of Internal Medicine* for serious illness communication highlights the importance of promoting high-quality goals-of-care discussions, as well as the potential opportunity to use the EHR to both identify those patients who would benefit from goals-of-care discussions and to guide clinicians in high-quality discussions.<sup>6</sup> We are conducting a pilot trial to examine the efficacy of such an intervention and facilitate the development and funding of an innovative hybrid effectiveness/implementation trial that evaluates the intervention and its implementation.<sup>23</sup>

#### b. Innovation

*Use of the EHR to identify seriously ill, hospitalized patients without a goals-of-care discussion:* We will use our EHR-based quality metrics program to identify hospitalized patients with chronic life-limiting illness or age >80 who do not have EHR documentation of a goals-of-care discussion, thereby targeting a population likely to benefit from the intervention. We proposed using an innovative NLP/ML protocol to identify inpatient and outpatient documentation of goals-of-care discussions; our preliminary data suggested an average accuracy of 90.1% for identifying this documentation, based on a dataset of 722 verified positive goals-of-care notes and 1671 negative notes. However, for this trial we opted to use the gold standard of manual abstraction to identify goals-of-care discussions.

*Deliver a bilateral communication-priming intervention for goals-of-care discussions in the hospital setting:* The intervention is based on our recently completed randomized trial of the Jumpstart intervention: a patient-specific pre-conversation communication-priming intervention targeting both patients and clinicians by providing each with information obtained from patient- reported surveys that is used to guide a goals-of-care discussion. In an outpatient study of 537 patients, the intervention increased goals-of-care discussions from 31% in the control group to 75% in the intervention (p<0.001) and increased patient-assessed quality of communication (p<0.001).<sup>2,12</sup> For this pilot trial, we adapted the intervention for hospitalized patients.

*Develop an innovative effectiveness/implementation trial that advances implementation science in palliative care:* This pilot assesses the feasibility, acceptability, and implementation of its methods and outcomes in the inpatient setting. We will follow this pilot with a novel hybrid effectiveness/implementation trial that would accelerate dissemination of the intervention by allowing us to evaluate implementation strategies and outcomes that may facilitate uptake of the intervention.<sup>23-27</sup> This innovative design offers the opportunity to advance implementation science in palliative care, increasing the utility and fundability of the next grant.

146  
147  
148  
149  
150  
151  
152  
153  
154  
155  
156  
157  
158  
159  
160  
161  
162  
163  
164  
165  
166  
167  
168  
169  
170  
171  
172  
173  
174  
175  
176  
177  
178  
179  
180  
181  
182  
183  
184  
185  
186  
187  
188  
189  
190  
191  
192  
193  
194  
195  
196  
197  
198

### c. Research Design and Methods

*i. Overview:* We will conduct a pilot randomized trial of an intervention to promote and guide goals-of-care discussions for seriously ill hospitalized patients using an automated method for identifying eligible participants. The trial will assess feasibility and acceptability (Aim 1) as well as efficacy for prompting discussions (Aim 2) and will use qualitative methods to explore barriers and facilitators to implementation and opportunities to improve the intervention (Aim 3).

*ii. Setting:* We will conduct this study at the two largest hospitals in the UW Medicine system. The University of Washington Medical Center (UWMC) provides tertiary care for the region and has 450 acute care beds and 75 ICU beds. The county safety-net hospital, Harborview Medical Center, is operated by the university and has 350 acute care beds and 94 ICU beds. This facility is the only Level 1 Trauma Center serving five states, and its mission population includes inner city poor, recent immigrants to the US, and persons with HIV/AIDS. These settings offer the advantage of caring for diverse patients while also using a unified EHR incorporating both Cerner and EPIC systems.

*iii. Patient population:* Eligible patients (aged 18 or older) will be identified by ICD-10 codes for at least one of the nine chronic conditions used by the Dartmouth Atlas to study end-of-life care: malignant cancer/leukemia, chronic pulmonary disease, coronary artery disease, congestive heart failure, chronic liver disease, chronic renal disease, dementia, diabetes with end-organ damage, and peripheral vascular disease.<sup>28</sup> These 9 conditions account for 90% of deaths amongst Medicare patients in the US.<sup>29,30</sup> We will also include all hospitalized patients over age 80 as well as patients over age 65 with markers of frailty including albumin level <4.0 within 48 hours of admission<sup>31-34</sup> plus EHR-documented weight loss of ≥10 pounds in the past year.<sup>35,36</sup> Among patients meeting these criteria, we will include only those with no identified documentation of goals-of-care discussions during the current hospitalization, as determined through daily screening of hospitalized patients using methods developed by our palliative care metrics program.<sup>7-10</sup> Patients will be eligible after a 12 hour stay with no maximum stay.

*iv. Study design:* In this pilot randomized trial, eligible patients will be assigned to intervention or usual care in a 1:1 ratio using variable size blocks and stratifying randomization by hospital.

*v. Intervention:* The intervention has four components (Figure 1). First, we will use our metrics program to identify seriously ill hospitalized patients. Second, consented patients will complete a survey assessing three domains: a) preferences for discussions about goals of care; b) most important barrier and facilitator for having such discussions; and c) current goals of care. If patients are not able to complete a survey, we will recruit a legal surrogate decision-maker to participate and complete the survey. We will use the protocol from our recent randomized trial to create a “Jumpstart form” to prompt and guide a goals-of-care discussion between the patient and physician team caring for the patient or, if the patient isn’t able, the family member and the physician team (including physicians, nurse practitioners, and physician assistants). Third, we will use our NLP/ML approach to identify goals-of-care discussions, POLST forms, or advance directives in the UW Medicine EHR prior to this admission (inpatient and outpatient) and include this information on the Jumpstart forms. Fourth, we will deliver the Jumpstart form to the primary physician team (all attending and resident physicians, subinterns, and advance practice providers on the primary team caring for the patient) via secure

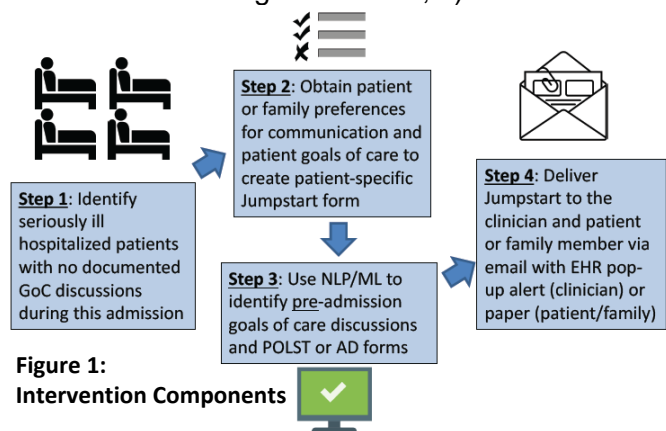

199 email with in-person delivery when possible, and we will also provide the patient or family with a  
200 patient/family version of the form. The Jumpstart forms will be delivered within 1-2 business days of  
201 randomization, as supported by the NQF.<sup>21</sup> The forms provide a distilled version of the patient/family  
202 survey responses and, based on the responses, patient-specific suggestions for conducting goals-of-  
203 care discussions with this patient or family. The suggestions will be guided by the experience and  
204 training of VitalTalk and adapted to the inpatient setting.<sup>37,38</sup> All forms include a link to a 3-minute “just-  
205 in-time” training video by VitalTalk on using the form (tailored to clinicians, patients, or family).

206

207 vi. Comparison group: The comparison group will receive usual care plus surveys, without steps 3 and  
208 4.

209

210 vii. Major outcomes: Aim 1 outcomes assessing the feasibility and acceptability of the intervention will  
211 be evaluated with the completion of study activities by those randomized to the intervention. . Aim 2  
212 outcomes will be assessed with patient/family-reported surveys completed by both intervention and  
213 comparison groups.

214 *Feasibility and acceptability (Aim 1):* Feasibility will be measured with the following: a) survey  
215 completion rates with the expectation that successful feasibility will be supported with >80%  
216 completion of patient/family surveys; b) receipt of the Jumpstart form with the expectation that >80%  
217 of clinicians and patients/families indicate having received the form; and c) use of the form, with the  
218 expectation that >80% of clinicians and patients/families will report that they have read the form. We  
219 will also add an open-ended question for participants to provide suggestions for improving the  
220 intervention.

221 *EHR documentation of goals-of-care discussions (Aim 2):* Documentation of goals-of-care  
222 discussions will be evaluated using both manual chart review and our NLP/ML methods, with manual  
223 chart review using our standard EHR abstraction methods providing the gold standard.<sup>39-41</sup>

224 *Patient or family member report of discussions and quality of discussions (Aim 2):* We will survey  
225 patients and family members using our previously validated items to assess the occurrence and  
226 quality of goals-of-care communication.<sup>11,42-44</sup> Quality of goals-of-care communication will be assessed  
227 with the end-of-life communication composite scale (QOC\_eol) of the Quality of Communication  
228 (QOC) survey. We developed the QOC from qualitative interviews and focus groups with a diverse set  
229 of patients, families, and clinicians.<sup>42,43,45</sup> The QOC\_eol subscale is based on 4 to 7 items, with item  
230 scores potentially ranging from 0 (worst) to 10 (best). We have tested its construct validity through  
231 associations with related concepts, such as the number of discussions with the doctor about end-of-  
232 life care ( $r=0.51$ ,  $p<0.001$ ), the extent the doctor knows the kinds of treatment wanted if the patient  
233 becomes too sick to speak for him/herself ( $r=0.39$ ,  $p<0.001$ ), and a single-item rating of the quality of  
234 discussions about end-of-life care ( $r=0.43$ ,  $p<0.001$ ).<sup>42</sup> The QOC\_eol scale was responsive to the  
235 Jumpstart intervention in our prior trials of this intervention.<sup>2,11,12,16</sup>

236

237 viii. Additional outcomes (Aim 2-3): We will collect additional outcomes to help inform the development  
238 of the subsequent randomized trial by assessing feasibility of collecting these outcomes in this design.

239 *Symptoms of anxiety and depression:* Patient and family member symptoms of anxiety and  
240 depression will be assessed with the Hospital Anxiety and Depression Scale (HADS). The HADS is a  
241 reliable, valid 14-item, 2-domain (anxiety and depression) tool used to assess symptoms of  
242 psychological distress.<sup>46,47</sup> Seven items evaluate anxiety and seven evaluate depression. Each item  
243 is scored on a 4-point scale (ranging from 0-3) with scores for each subscale (anxiety and depression)  
244 ranging from 0-21. The HADS instrument has been used in over 700 studies with evidence of  
245 reliability, validity and responsiveness among patients with acute illness and their family members<sup>48-60</sup>  
246 and has become a standard measure for patients and family members after critical illness.<sup>61,62</sup>

247 *Goal-concordant care:* Concordance between the care patients want and the care they are  
248 receiving will be measured with two questions from SUPPORT.<sup>63</sup> The first question defines patients’  
249 priorities for extending life or ensuring comfort: “If you had to make a choice at this time, would you  
250 prefer a course of treatment that focuses on extending life as much as possible, even if it means  
251 having more pain and discomfort, or would you want a plan of care that focuses on relieving pain and

252 discomfort as much as possible, even if that means not living as long?" The next question assesses  
253 patients' perceptions of current treatment using the same two options.<sup>63</sup> Concordance is defined as a  
254 match between preference for care and the type of care currently received, as reported by patients (or  
255 families if patients are not able). Although many patients indicate they want *both* quality and life-  
256 extending care, this requirement to pick one is a useful way to identify patients' top priority.<sup>64-66</sup> If  
257 patients are unable to respond, goals of care are determined by family; this approach mirrors clinical  
258 practice. This measure was responsive to the Jumpstart intervention in our recent trial.<sup>2,12</sup> Based on  
259 prior studies,<sup>63</sup> we expect only 60% of patients will be receiving care concordant with their goals.<sup>2</sup>

260 *Implementation:* We will collect qualitative data on barriers and facilitators for implementation,  
261 guided by the Consolidated Framework for Implementation Research, including those related to the  
262 intervention, settings (inner and outer), processes, and individuals (see Aim 3 analyses).<sup>26</sup>

263  
264 *ix. Description of participants:* For all participants, we will collect age, gender, race/ethnicity, and  
265 education (or profession for clinicians). For patients, we will collect comorbidities.<sup>67</sup> For family, we will  
266 collect relationship with the patient.

#### 267 268 x. Quantitative data collection

269 *Surveys:* Surveys will be completed by patients/family at two points in time: 1) at enrollment; and 2)  
270 at 4-5 business days after randomization. Clinicians will complete surveys at time point 2. Surveys  
271 may be completed in-person, online, or by phone, based on respondents' preferences.

272 *Patients and family members:* Patients will be surveyed if they are able. Study staff will use a  
273 brief six-item screening tool to assess cognitive impairment.<sup>68</sup> If patients are not able to participate,  
274 we will identify a legal surrogate decision-maker to consent for both the patient and themselves. The  
275 first survey completed at enrollment will include: a) preferences for goals-of-care communication; b)  
276 goals of care; c) barriers and facilitators to goals-of-care communication. The second survey,  
277 completed 4-5 days later, will include items evaluating occurrence and quality of communication,  
278 anxiety and depression (HADS), and goal concordant care. All participants will complete questions  
279 about whether they recall using a Jumpstart form and, if yes, was it understandable and useful. In our  
280 prior studies, we found some patients in the comparison group who had not received the form  
281 mistakenly thought that they received it and, therefore, these are important data to collect.

282 *Clinicians:* At patient enrollment, we will collect data on clinicians on the acute care team from  
283 hospital records (e.g., age, gender, specialty, level of training) in both arms. After the intervention, a  
284 "primary clinician" will be identified for intervention patients (the clinician who did or could have had a  
285 goals-of-care discussion) and asked items assessing the intervention: 1) Did he/she complete a goals  
286 of care discussions with patient and/or family? 2) If not, what were the reasons for not having had this  
287 discussion? 3) Was the Jumpstart used? 3) Would he/she recommend the Jumpstart to other  
288 clinicians?

289  
290 *EHR:* We will use our EHR-based quality metrics program to obtain data about patients from the  
291 EHR,<sup>7-10,69</sup> collecting demographics, co-morbidities, and documentation of goals-of-care discussions  
292 preceding and during the patient's inpatient stay. In addition, we will conduct a manual chart review to  
293 corroborate the documentation of goals-of-care discussions using study staff trained to identify these  
294 discussions.<sup>2,39-41</sup>

295  
296 *Qualitative data collection:* Aim 3 will use data from 30 semi-structured interviews with patients,  
297 family members and clinicians. We will use purposive sampling to ensure a diverse group based on  
298 race/ethnicity, age, gender, and, for clinicians, specialty and year of training. Participants will be  
299 interviewed by a trained qualitative researcher using an interview guide and interviews will be audio-  
300 recorded and transcribed, similar to our prior qualitative research.<sup>70-77</sup>

301

302  
303  
304  
305  
306  
307  
308  
309  
310  
311  
312  
313  
314  
315  
316  
317  
318  
319  
320  
321  
322  
323  
324  
325  
326  
327  
328  
329  
330  
331  
332  
333  
334  
335  
336  
337  
338  
339  
340  
341  
342  
343  
344  
345  
346  
347  
348  
349  
350  
351  
352  
353  
354

#### **d. Aim-specific Analyses:**

##### Aim 1: Pilot randomized trial to evaluate the intervention's feasibility and acceptability.

We will assess for successful implementation of the intervention using descriptive statistics to examine the proportion of eligible patients who are enrolled and, among those randomized to the intervention, the proportion of clinicians and patients/families who receive the intervention. We anticipate that 80% of patients randomized to the intervention will receive the intervention and, with our sample size ( $n=75$  intervention patients), we will be able to identify this proportion with 95% confidence intervals of  $\pm 7\%$ . We will also examine feasibility of the intervention components as the proportion of enrolled patients for whom each one of the four intervention steps are successfully completed (see Figure 1).

##### Aim 2: Evaluate the efficacy of the intervention for changing processes of care.

*The primary outcome of this trial is the documentation of a goals-of-care discussion in the EHR,* which will be assessed with a logistic regression model with adjustment for hospital site and actual confounders. Actual confounders will be patient characteristics (listed above) that change the coefficient for the relationship between intervention-control predictor and the outcome by more than 10%. We will adjust for confounders in this pilot trial in order to maximize the accuracy of the treatment estimate.<sup>78</sup> The intervention's effect on the quality of communication about goals-of-care will be assessed with a composite QOC\_eol outcome, collected from patients or family members. The test will use a linear regression model, estimating the coefficient for the outcome regressed on the control/intervention predictor, after adjustment for actual confounders (as above).

We will collect data on the other outcomes to ensure feasibility of outcome assessment with this study design. We will perform descriptive statistics for all outcomes to understand distribution, range, and central tendencies, but we will not report hypothesis testing for these variables in this pilot.<sup>79-81</sup>

##### Aim 3: Interviews to identify barriers and facilitators for implementation of the intervention.

We will perform a modified grounded theory analysis of transcribed interviews to explore feedback on the intervention, ways to improve the intervention delivery and implementation, and aspects of care not adequately addressed by the intervention.<sup>82-85</sup> Interview guides and analyses will be guided by the Consolidated Framework for Implementation Research to explore factors affecting implementation, within 5 domains: intervention, settings, processes, individuals<sup>26</sup> Qualitative data will be imported to analytic software (Dedoose), where the investigators and coordinator will perform iterative, inductive coding to identify recurrent themes, categories, and relationships among themes and categories. The analysis process will include open coding (identifying major themes and component codes), selective coding (refining themes and codes under each theme), and axial coding (uncovering relationships among themes and codes.)<sup>82,85</sup> To ensure trustworthiness (a qualitative concept similar to reliability in quantitative analysis<sup>85-88</sup>), we will perform a "member check" of the results with participants ( $n=6$ ) selected for diversity of participant type. We have extensive experience using grounded theory to develop an understanding of palliative care and interventions for improving this care.<sup>71,89-97</sup>

#### **e. Sample size considerations:**

Sample size estimation for pilot trials are often determined by requirements associated with feasibility and acceptability assessments, and one should use caution in powering pilot studies based on key outcomes.<sup>79-81</sup> However, we chose to power this pilot study based on a "process of care" outcome – the documentation of goals-of-care discussions – to assess efficacy and facilitate future studies. In our recent outpatient trial, the Jumpstart intervention was associated with a significant increase in documentation of goals-of-care discussions from 17% in the control group to 62% in the intervention group ( $p<0.001$ ).<sup>2,12</sup> Based on our preliminary data, we estimate that 50% of the control group in this inpatient setting will have documented goals-of-care discussions by the time of death or discharge. This estimate provides for estimates that are maximally conservative, since power increases further

355 from the 50% mark. We powered this trial to determine if the intervention is able to increase this  
356 proportion to 75%, with 95% confidence intervals and power of 80%: this would require a sample size  
357 of 55 patients in each group with complete data. We plan to recruit 75 patients in each group to  
358 ensure complete data on 55 patients in each arm. This sample size of 75 patients in the intervention  
359 group will also provide adequate power to assess feasibility and acceptability.<sup>79-81</sup>

360 For Aim 3, it is important to achieve theoretical saturation (no new themes emerging).<sup>85,98</sup> We will  
361 monitor for saturation, and if saturation is not achieved, we will recruit additional participants.

#### 362 363 **f. Data management and quality control to achieve scientific rigor**

365 This project requires the creation, maintenance, and analysis of a database that includes a variety  
366 of measures from multiple sources. This study, like all studies, depends on the quality of the data and  
367 therefore systematic data collection, quality control, and data-management procedures will be  
368 implemented: 1) protocols for data collection; 2) rigorous training, certification, and periodic re-training  
369 of study staff, with ongoing monitoring of adherence to protocols; 3) regular review of questionnaire  
370 response rates, respondent burden,<sup>99</sup> and missing items to identify and correct problems; 4)  
371 verification of all data through custom-designed data entry systems; and 5) monthly team meetings  
372 and reports to provide feedback to study staff to ensure problems are resolved quickly. To ensure  
373 reliability and validity of data, we will use our current methods for training and quality control.<sup>100-104</sup>  
374 Staff conducting EHR review will undergo >80 hours of training: instruction on the protocol, guided  
375 practice abstraction, and independent abstraction with reconciliation by a trainer. A 10% random  
376 sample will be dual-abstracted. We will blind abstractors to randomization status and survey results.

#### 377 378 **g. Protocol modifications**

380 NLP/ML algorithm: Our NLP/ML algorithm has required ongoing refinement. Hence, for this study we  
381 implemented manual abstraction for the purposes of collecting our primary outcome measure, EHR  
382 documentation of a goals of care discussion. We are using data gathered via manual abstraction to  
383 refine our NLP/ML algorithm. The performance characteristics of this new algorithm are improving  
384 over time. A recent version of this algorithm, compared to the standard of manual abstraction, shows  
385 a sensitivity of 57%, specificity of 99%, positive predictive value of 53% and negative predictive value  
386 of 99%. This produced a positive likelihood ratio of 0.43 and a negative likelihood ratio of 0.71.  
387 Although these are good test characteristics, sensitivity and positive predictive values are too low to  
388 use this algorithm for outcome adjudication in a randomized trial.

389 Time to event: Our initial intent was to assess time to goals-of-care discussion as a secondary  
390 outcome. However, given the low proportion of events, this analysis was not included.

#### 391 392 393 **h. Anticipated limitations**

395 *Sample size:* The sample size will limit our ability to detect differences between groups for most  
396 outcome measures. However, the goals of this pilot study are to assess feasibility and acceptability of  
397 the intervention, evaluate for increased documentation of goals-of-care discussions, and develop  
398 insights for how to make the intervention more effective. The sample size is adequate for these goals.

399 *Generalizability:* This study occurs in a single healthcare system which limits generalizability, but  
400 includes two diverse hospitals that use both Cerner and EPIC EHRs, which enhances generalizability.  
401 Including additional healthcare systems is not feasible for this pilot.

402 *Scalability of surveys:* Study staff will distribute surveys which would not be scalable for broad  
403 implementation of the intervention in clinical practice. However, Aim 3 will provide insights into how  
404 best to address this limitation for the subsequent hybrid effectiveness-implementation trial.

405 *Quality of communication:* Our NLP/ML and manual abstraction approaches identify goals-of-care  
406 discussions without assessing their quality. Since our prior trials demonstrated increased patient-



407 assessed quality with the intervention, this is less of a concern.<sup>2,12</sup> Future NLP/ML advances may  
408 permit quality assessments.

409

#### 410 i. **Anticipated findings**

411

412 This proposed pilot study is an innovative intervention to improve goals-of-care discussions for  
413 seriously ill hospitalized patients and their families. The intervention uses the EHR to identify patients  
414 who should have documentation of a goals-of-care discussion but do not, and then prompts and  
415 guides this discussion with a bilateral intervention that provides patient-specific support to clinicians,  
416 their patients or their family members. The goal of this pilot study is to create the foundation for an  
417 innovative effectiveness-implementation trial that would be submitted to the NIH.

418

#### 419 j. **References**

420

- 421 1. Wright AA, Zhang B, Ray A, et al. Associations between end-of-life discussions, patient mental  
422 health, medical care near death, and caregiver bereavement adjustment. *JAMA* 2008;300:1665-  
423 73.
- 424 2. Fakhri S, Engelberg RA, Downey L, et al. Factors Affecting Patients' Preferences for and Actual  
425 Discussions About End-of-Life Care. *J Pain Symptom Manage* 2016;52:386-94.
- 426 3. Heyland DK, Dodek P, You JJ, et al. Validation of quality indicators for end-of-life  
427 communication: results of a multicentre survey. *CMAJ* 2017;189:E980-E9.
- 428 4. Silveira MJ, Kim SY, Langa KM. Advance directives and outcomes of surrogate decision making  
429 before death. *N Engl J Med* 2010;362:1211-8.
- 430 5. Teno JM, Gruneir A, Schwartz Z, Nanda A, Wetle T. Association between advance directives  
431 and quality of end-of-life care: a national study. *J Am Geriatr Soc* 2007;55:189-94.
- 432 6. Tulskey JA, Beach MC, Butow PN, et al. A Research Agenda for Communication Between Health  
433 Care Professionals and Patients Living With Serious Illness. *JAMA Intern Med* 2017;177:1361-6.
- 434 7. Curtis JR, Sathitratanaheewin S, Starks H, et al. Using Electronic Health Records for Quality  
435 Measurement and Accountability in Care of the Seriously Ill: Opportunities and Challenges. *J*  
436 *Palliat Med* 2017; epub ahead of print.
- 437 8. Lavin K, Davydow DS, Downey L, et al. Effect of Psychiatric Illness on Acute Care Utilization at  
438 End of Life From Serious Medical Illness. *J Pain Symptom Manage* 2017;54:176-85 e1.
- 439 9. Hicks K, Downey L, Engelberg RA, et al. Predictor of death in the hospital for patients with  
440 chronic serious illness. *Journal of Palliative Medicine* 2017; epub ahead of print.
- 441 10. Sathitratanaheewin S, Engelberg RA, Downey L, et al. Temporal trends between 2010 and  
442 2015 in intensity of care at end-of-life for patients with chronic illness: Influence of age under  
443 versus over 65 years. *J Pain Symptom Manage* 2017; epub ahead of print.
- 444 11. Au DH, Udris EM, Engelberg RA, et al. A Randomized Trial to Improve Communication About  
445 End-of-Life Care Among Patients With COPD. *Chest* 2012;141:726-35.
- 446 12. Curtis JR, Downey L, Back AL, et al. A patient and clinician communication-priming intervention  
447 increases patient-reported goals-of-care discussions between patients with serious illness and  
448 clinicians: a randomized trial. 2017; Under review.
- 449 13. Institute of Medicine. Improving Quality and Honoring Individual Preferences Near the End of  
450 Life. Washington, DC: National Academy Press; 2015.
- 451 14. Lorenz K, Lynn J, Morton SC. End-of-Life Care and Outcomes. Summary, Evidence  
452 Report/Technology Assessment: Number 110. AHRQ Publication Number 05-E004-1. Agency  
453 for Healthcare Research and Quality, 2004. (Accessed February 15, 2012, at  
454 <http://www.ahrq.gov/clinic/epcsums/eolsum.htm>.)
- 455 15. Detering KM, Hancock AD, Reade MC, Silvester W. The impact of advance care planning on  
456 end of life care in elderly patients: randomised controlled trial. *BMJ* 2010;340:c1345.
- 457 16. Hanson LC, Zimmerman S, Song MK, et al. Effect of the Goals of Care Intervention for  
458 Advanced Dementia: A Randomized Clinical Trial. *JAMA Intern Med* 2017;177:24-31.

- 459 17. Torke AM, Callahan CM, Sachs GA, et al. Communication Quality Predicts Psychological Well-  
460 Being and Satisfaction in Family Surrogates of Hospitalized Older Adults: An Observational  
461 Study. *J Gen Intern Med* 2017; epub ahead of print.
- 462 18. Sudore RL, Fried TR. Redefining the "planning" in advance care planning: preparing for end-of-  
463 life decision making. *Ann Intern Med* 2010;153:256-61.
- 464 19. Sudore RL, Lum HD, You JJ, et al. Defining Advance Care Planning for Adults: A Consensus  
465 Definition From a Multidisciplinary Delphi Panel. *J Pain Symptom Manage* 2017;53:821-32 e1.
- 466 20. Sinuff T, Dodek P, You JJ, et al. Improving End-of-Life Communication and Decision Making:  
467 The Development of a Conceptual Framework and Quality Indicators. *J Pain Symptom Manage*  
468 2015;49:1070-80.
- 469 21. National Quality Forum, Measure 1626: Patients Admitted to ICU who Have Care Preferences  
470 Documented within 48 hours (RAND Corporation). 2017. (Accessed January 2, 2018, at  
471 [https://www.qualityforum.org/News\\_And\\_Resources/Endorsement\\_Summaries/Endorsement\\_S](https://www.qualityforum.org/News_And_Resources/Endorsement_Summaries/Endorsement_Summaries.aspx)  
472 [ummaries.aspx](https://www.qualityforum.org/News_And_Resources/Endorsement_Summaries/Endorsement_Summaries.aspx).)
- 473 22. Heyland DK, Barwich D, Pichora D, et al. Failure to engage hospitalized elderly patients and  
474 their families in advance care planning. *JAMA Intern Med* 2013;173:778-87.
- 475 23. Curran GM, Bauer M, Mittman B, Pyne JM, Stetler C. Effectiveness-implementation hybrid  
476 designs: combining elements of clinical effectiveness and implementation research to enhance  
477 public health impact. *Med Care* 2012;50:217-26.
- 478 24. Peters DH, Adam T, Alonge O, Agyepong IA, Tran N. Implementation research: what it is and  
479 how to do it. *BMJ* 2013;347:f6753.
- 480 25. Bauer MS, Damschroder L, Hagedorn H, Smith J, Kilbourne AM. An introduction to  
481 implementation science for the non-specialist. *BMC Psychol* 2015;3:32.
- 482 26. Damschroder LJ, Aron DC, Keith RE, Kirsh SR, Alexander JA, Lowery JC. Fostering  
483 implementation of health services research findings into practice: a consolidated framework for  
484 advancing implementation science. *Implement Sci* 2009;4:50.
- 485 27. Proctor E, Silmere H, Raghavan R, et al. Outcomes for implementation research: conceptual  
486 distinctions, measurement challenges, and research agenda. *Adm Policy Ment Health*  
487 2011;38:65-76.
- 488 28. The Dartmouth Atlas of Healthcare. 2016. (Accessed March 25, 2017, at  
489 [www.dartmouthatlas.org](http://www.dartmouthatlas.org).)
- 490 29. Wennberg JE, Bronner K, Skinner JS, Fisher ES, Goodman DC. Inpatient care intensity and  
491 patients' ratings of their hospital experiences. *Health Aff (Millwood)* 2009;28:103-12.
- 492 30. Wennberg JE, Fisher ES, Stukel TA, Skinner JS, Sharp SM, Bronner KK. Use of hospitals,  
493 physician visits, and hospice care during last six months of life among cohorts loyal to highly  
494 respected hospitals in the United States. *BMJ* 2004;328:607.
- 495 31. Goldwasser P, Mittman N, Antignani A, et al. Predictors of mortality in hemodialysis patients. *J*  
496 *Am Soc Nephrol* 1993;3:1613-22.
- 497 32. Foley RN, Parfrey PS, Harnett JD, Kent GM, Murray DC, Barre PE. Hypoalbuminemia, cardiac  
498 morbidity, and mortality in end-stage renal disease. *J Am Soc Nephrol* 1996;7:728-36.
- 499 33. Owen WF, Jr., Lew NL, Liu Y, Lowrie EG, Lazarus JM. The urea reduction ratio and serum  
500 albumin concentration as predictors of mortality in patients undergoing hemodialysis. *N Engl J*  
501 *Med* 1993;329:1001-6.
- 502 34. Soucie JM, McClellan WM. Early death in dialysis patients: risk factors and impact on incidence  
503 and mortality rates. *J Am Soc Nephrol* 1996;7:2169-75.
- 504 35. Zaslavsky AM, Beaulieu ND, Landon BE, Cleary PD. Dimensions of consumer-assessed quality  
505 of Medicare managed-care health plans. *Medical Care* 2000;38:162-74.
- 506 36. Fried LP, Tangen CM, Walston J, et al. Frailty in older adults: evidence for a phenotype. *J*  
507 *Gerontol A Biol Sci Med Sci* 2001;56:M146-56.
- 508 37. Back AL, Arnold RM, Baile WF, et al. Efficacy of communication skills training for giving bad  
509 news and discussing transitions to palliative care. *Arch Intern Med* 2007;167:453-60.
- 510 38. Back AL, Arnold RM, Tulskey JA, Baile WF, Fryer-Edwards KA. Teaching communication skills to  
511 medical oncology fellows. *J Clin Oncol* 2003;21:2433-6.

- 512 39. Curtis JR, Nielsen EL, Treece PD, et al. Effect of a quality-improvement intervention on end-of-  
513 life care in the intensive care unit: a randomized trial. *Am J Respir Crit Care Med* 2011;183:348-  
514 55.
- 515 40. Curtis JR, Treece PD, Nielsen EL, et al. Integrating palliative and critical care: evaluation of a  
516 quality-improvement intervention. *Am J Respir Crit Care Med* 2008;178:269-75.
- 517 41. Curtis JR, Treece PD, Nielsen EL, et al. Randomized Trial of Communication Facilitators to  
518 Reduce Family Distress and Intensity of End-of-Life Care. *Am J Respir Crit Care Med*  
519 2016;193:154-62.
- 520 42. Engelberg R, Downey L, Curtis JR. Psychometric characteristics of a quality of communication  
521 questionnaire assessing communication about end-of-life care. *J Palliat Med* 2006;9:1086-98.
- 522 43. Curtis JR, Engelberg RA, Nielsen EL, Au DH, Patrick DL. Patient-physician communication  
523 about end-of-life care for patients with severe COPD. *Eur Respir J* 2004;24:200-5.
- 524 44. Curtis JR, Patrick DL, Caldwell E, Greenlee H, Collier AC. The quality of patient-clinician  
525 communication about end-of-life care: A study of patients with AIDS and their primary care  
526 clinicians. *AIDS* 1999;13:1123-31.
- 527 45. Janssen DJ, Curtis JR, Au DH, et al. Patient-clinician communication about end-of-life care for  
528 Dutch and US patients with COPD. *Eur Respir J* 2011;38:268-76.
- 529 46. Zigmond AS, Snaith RP. The hospital anxiety and depression scale. *Acta Psychiatr Scand*  
530 1983;67:361-70.
- 531 47. Bjelland I, Dahl AA, Haug TT, Neckelmann D. The validity of the Hospital Anxiety and  
532 Depression Scale. An updated literature review. *J Psychosom Res* 2002;52:69-77.
- 533 48. Lautrette A, Darmon M, Megarbane B, et al. A communication strategy and brochure for relatives  
534 of patients dying in the ICU. *N Engl J Med* 2007;356:469-78.
- 535 49. Pochard F, Azoulay E, Chevret S, et al. Symptoms of anxiety and depression in family members  
536 of intensive care unit patients: Ethical hypothesis regarding decision-making capacity. *Crit Care*  
537 *Med* 2001;29:1893-7.
- 538 50. Azoulay E, Pochard F, Kentish-Barnes N, et al. Risk of post-traumatic stress symptoms in family  
539 members of intensive care unit patients. *Am J Respir Crit Care Med* 2005;171:987-94.
- 540 51. Azoulay E, Pochard F, Chevret S, et al. Half the family members of intensive care unit patients  
541 do not want to share in the decision-making process: a study in 78 French intensive care units.  
542 *Crit Care Med* 2004;32:1832-8.
- 543 52. Azoulay E, Pochard F, Chevret S, et al. Meeting the needs of intensive care unit patient families:  
544 a multicenter study. *Am J Respir Crit Care Med* 2001;163:135-9.
- 545 53. Anderson WG, Arnold RM, Angus DC, Bryce CL. Posttraumatic stress and complicated grief in  
546 family members of patients in the intensive care unit. *J Gen Intern Med* 2008;23:1871-6.
- 547 54. Anderson WG, Arnold RM, Angus DC, Bryce CL. Passive decision-making preference is  
548 associated with anxiety and depression in relatives of patients in the intensive care unit. *Journal*  
549 *of critical care* 2009;24:249-54.
- 550 55. Fumis RR, Deheinzelin D. Family members of critically ill cancer patients: assessing the  
551 symptoms of anxiety and depression. *Intensive Care Med* 2009;35:899-902.
- 552 56. Fumis RR, Ranzani OT, Faria PP, Schettino G. Anxiety, depression, and satisfaction in close  
553 relatives of patients in an open visiting policy intensive care unit in Brazil. *J Crit Care*  
554 2015;30:440 e1-6.
- 555 57. Fumis RR, Ranzani OT, Martins PS, Schettino G. Emotional disorders in pairs of patients and  
556 their family members during and after ICU stay. *PLoS One* 2015;10:e0115332.
- 557 58. Garrouste-Orgeas M, Coquet I, Perier A, et al. Impact of an intensive care unit diary on  
558 psychological distress in patients and relatives\*. *Crit Care Med* 2012;40:2033-40.
- 559 59. Garrouste-Orgeas M, Philippart F, Timsit JF, et al. Perceptions of a 24-hour visiting policy in the  
560 intensive care unit. *Crit Care Med* 2008;36:30-5.
- 561 60. Garrouste-Orgeas M, Willems V, Timsit JF, et al. Opinions of families, staff, and patients about  
562 family participation in care in intensive care units. *J Crit Care* 2010;25:634-40.

- 563 61. Needham DM, Sepulveda KA, Dinglas VD, et al. Core Outcome Measures for Clinical Research  
564 in Acute Respiratory Failure Survivors. An International Modified Delphi Consensus Study. *Am J*  
565 *Respir Crit Care Med* 2017;196:1122-30.
- 566 62. Connolly B, Hough CL. Coloring by Number? Core Outcome Measures and the Canvas of  
567 Intensive Care Unit Survivorship. *Am J Respir Crit Care Med* 2017;196:1087-9.
- 568 63. Teno JM, Fisher ES, Hamel MB, Coppola K, Dawson NV. Medical care inconsistent with  
569 patients' treatment goals: association with 1-year Medicare resource use and survival. *J Am*  
570 *Geriatr Soc* 2002;50:496-500.
- 571 64. Coast J, Huynh E, Kinghorn P, Flynn T. Complex Valuation: Applying Ideas from the Complex  
572 Intervention Framework to Valuation of a New Measure for End-of-Life Care.  
573 *Pharmacoeconomics* 2016;34:499-508.
- 574 65. Finkelstein EA, Bilger M, Flynn TN, Malhotra C. Preferences for end-of-life care among  
575 community-dwelling older adults and patients with advanced cancer: A discrete choice  
576 experiment. *Health Policy* 2015;119:1482-9.
- 577 66. Flynn TN, Bilger M, Malhotra C, Finkelstein EA. Are Efficient Designs Used in Discrete Choice  
578 Experiments Too Difficult for Some Respondents? A Case Study Eliciting Preferences for End-  
579 of-Life Care. *Pharmacoeconomics* 2016;34:273-84.
- 580 67. Kajdacsy-Balla Amaral AC, Andrade FM, Moreno R, Artigas A, Cantraine F, Vincent JL. Use of  
581 the sequential organ failure assessment score as a severity score. *Intensive care medicine*  
582 2005;31:243-9.
- 583 68. Callahan CM, Unverzagt FW, Hui SL, Perkins AJ, Hendrie HC. Six-item screener to identify  
584 cognitive impairment among potential subjects for clinical research. *Med Care* 2002;40:771-81.
- 585 69. Steiner J, Kirkpatrick JN, Heckbert SR, et al. Identification of adults with congenital heart disease  
586 of moderate or great complexity from administrative data. *Congenital Heart Disease* 2017;In  
587 press.
- 588 70. Back AL, Young JP, McCown E, et al. Abandonment at the end of life from patient, caregiver,  
589 nurse, and physician perspectives: loss of continuity and lack of closure. *Arch Intern Med*  
590 2009;169:474-9.
- 591 71. Curtis JR, Engelberg R, Young JP, et al. An approach to understanding the interaction of hope  
592 and desire for explicit prognostic information among individuals with severe chronic obstructive  
593 pulmonary disease or advanced cancer. *J Palliat Med* 2008;11:610-20.
- 594 72. Carline JD, Curtis JR, Wenrich MD, Shannon SE, Ambrozy DM, Ramsey PG. Physicians'  
595 interactions with health care teams and systems in the care of dying patients: Perspectives of  
596 dying patients, family members, and health care providers. *J Pain Symptom Manage*  
597 2003;25:19-28.
- 598 73. Curtis JR, Patrick DL, Caldwell E, Collier AC. Why don't patients with AIDS and their clinicians  
599 talk about end-of-life care? Barriers to communication for patients with AIDS and their primary  
600 care clinicians. *Arch Intern Med* 2000;160:1690-6.
- 601 74. Curtis JR, Wenrich MD, Carline JD, Shannon SE, Ambrozy DM, Ramsey PG. Understanding  
602 physicians' skills at providing end-of-life care: Perspectives of patients, families, and health care  
603 workers. *J Gen Intern Med* 2001;16:41-9.
- 604 75. Curtis JR, Wenrich MD, Carline JD, Shannon SE, Ambrozy DM, Ramsey PG. Patients'  
605 perspectives on physicians' skills at end-of-life care: Differences between patients with COPD,  
606 cancer, and AIDS. *Chest* 2002;122:356-62.
- 607 76. Wenrich MD, Curtis JR, Ambrozy DM, et al. Provision of emotional support and personalized  
608 care by physicians to patients nearing the end of life. *J Pain Symptom Manage* 2003;25:236-46.
- 609 77. Wenrich MD, Curtis JR, Shannon SE, Carline JD, Ambrozy DM, Ramsey PG. Communicating  
610 with dying patients within the spectrum of medical care from terminal diagnosis to death. *Arch*  
611 *Intern Med* 2001;161:868-74.
- 612 78. Hauck WW, Anderson S, Marcus SM. Should we adjust for covariates in nonlinear regression  
613 analyses of randomized trials? *Controlled Clinical Trials* 1998;19:249-56.
- 614 79. Kistin C, Silverstein M. Pilot Studies: A Critical but Potentially Misused Component of  
615 Interventional Research. *JAMA* 2015;314:1561-2.

- 616 80. Moore CG, Carter RE, Nietert PJ, Stewart PW. Recommendations for planning pilot studies in  
617 clinical and translational research. *Clin Transl Sci* 2011;4:332-7.
- 618 81. Leon AC, Davis LL, Kraemer HC. The role and interpretation of pilot studies in clinical research.  
619 *J Psychiatr Res* 2011;45:626-9.
- 620 82. Corbin J, Strauss A. *Methods of qualitative research*. Thousand Oaks, CA: Sage Publications;  
621 1993.
- 622 83. Glaser BG. *Emerging vs. Forcing: Basics of Grounded Theory Analysis*. Mill Valley, CA:  
623 Sociology Press; 1992.
- 624 84. Glaser BG, Strauss AL. *Discovery of Grounded Theory*. Chicago: Adline Publishing Company;  
625 1967.
- 626 85. Strauss AL, Corbin J. *Basics of Qualitative Research: Techniques and Procedures for*  
627 *Developing Grounded Theory*. Thousand Oaks: Sage Publications; 1998.
- 628 86. Giacomini M, Cook DJ, for the Evidence-Based Medicine Working Group. Qualitative research in  
629 health care: Are the results of the study valid? *JAMA* 2000;284:357-62.
- 630 87. Miles MB, Huberman AM. *Qualitative Data Analysis: An expanded sourcebook*. 2nd ed.  
631 Thousand Oaks, CA: Sage Publications; 1994.
- 632 88. Stange KC, Miller WL, Crabtree BJ, O'Connor PJ, Zyzanski SJ. Multimethod research:  
633 Approaches for integrating qualitative and quantitative research. *Journal of General Internal*  
634 *Medicine* 1994;9:278-82.
- 635 89. Curtis JR, Engelberg RA, Wenrich MD, Au DH. Communication about palliative care for patients  
636 with chronic obstructive pulmonary disease. *J Palliat Care* 2005;21:157-64.
- 637 90. Curtis JR, Engelberg RA, Wenrich MD, et al. Studying communication about end-of-life care  
638 during the ICU family conference: Development of a framework. *J Crit Care* 2002;17:147-60.
- 639 91. Curtis JR, Engelberg RA, Wenrich MD, Shannon SE, Treece PD, Rubenfeld GD. Missed  
640 opportunities during family conferences about end-of-life care in the intensive care unit. *Am J*  
641 *Respir Crit Care Med* 2005;171:844-9.
- 642 92. Engelberg RA, Wenrich MD, Curtis JR. Responding to families' questions about the meaning of  
643 physical movements in critically ill patients. *J Crit Care* 2008;23:565-71.
- 644 93. Howell AA, Nielsen EL, Turner AM, Curtis JR, Engelberg RA. Clinician perceptions of the role of  
645 an interprofessional communication facilitator to improve family outcomes in the ICU *Am J Crit*  
646 *Care* 2014;23:380-6.
- 647 94. Reinke LF, Engelberg RA, Shannon SE, et al. Transitions regarding palliative and end-of-life  
648 care in severe chronic obstructive pulmonary disease or advanced cancer: themes identified by  
649 patients, families, and clinicians. *J Palliat Med* 2008;11:601-9.
- 650 95. Reinke LF, Shannon SE, Engelberg RA, Young JP, Curtis JR. Supporting hope and prognostic  
651 information: nurses' perspectives on their role when patients have life-limiting prognoses. *J Pain*  
652 *Symptom Manage* 2010;39:982-92.
- 653 96. West HF, Engelberg RA, Wenrich MD, Curtis JR. Expressions of nonabandonment during the  
654 intensive care unit family conference. *J Palliat Med* 2005;8:797-807.
- 655 97. White DB, Engelberg RA, Wenrich MD, Lo B, Curtis JR. Prognostication during physician-family  
656 discussions about limiting life support in intensive care units. *Crit Care Med* 2007;35:442-8.
- 657 98. Giacomini M, Cook DJ, for the Evidence-Based Medicine Working Group. Qualitative research in  
658 health care: What are the results and how do they help me care for my patients? *JAMA*  
659 2000;284:478-82.
- 660 99. Kross EK, Nielsen EL, Curtis JR, Engelberg RA. Survey Burden for Family Members Surveyed  
661 About End-of-Life Care in the Intensive Care Unit. *Journal of Pain and Symptom Management*  
662 2012;44:671-80.
- 663 100. Glavan BJ, Engelberg RA, Downey L, Curtis JR. Using the medical record to evaluate the quality  
664 of end-of-life care in the intensive care unit. *Crit Care Med* 2008;36:1138-46.
- 665 101. Gries CJ, Engelberg RA, Kross EK, et al. Predictors of symptoms of posttraumatic stress and  
666 depression in family members after patient death in the ICU. *Chest* 2010;137:280-7.
- 667 102. Gries CJ, Curtis JR, Wall RJ, Engelberg RA. Family member satisfaction with end-of-life decision  
668 making in the ICU. *Chest* 2008;133:704-12.

- 669 103. Gerstel E, Engelberg RA, Koepsell T, Curtis JR. Duration of withdrawal of life support in the  
670 intensive care unit and association with family satisfaction. *Am J Respir Crit Care Med*  
671 2008;178:798-804.
- 672 104. Kross EK, Engelberg RA, Gries CJ, Nielsen EL, Zatzick D, Curtis JR. ICU care associated with  
673 symptoms of depression and posttraumatic stress disorder among family members of patients  
674 who die in the ICU. *Chest* 2011;139:795-801.  
675
