# Supplementary material for: Efficacy of a Communication-Priming Intervention on Documented Goals-of-Care Discussions in Hospitalized Patients With Serious Illness: A Randomized Clinical Trial
Source: PubMed Central journal article supplement (PMC8976242; doi:10.1001/jamanetworkopen.2022.5088), 2022-04-01
Supplement: jamanetwopen-e225088-s003.pdf [file jamanetwopen-e225088-s003.pdf]

## Data Sharing Statement

Lee. Efficacy of a Communication-Priming Intervention on Documented Goals-of-Care Discussions in Hospitalized Patients With Serious Illness. *JAMA Netw Open*. Published April 01, 2022. doi:10.1001/jamanetworkopen.2022.5088

### Data

**Data available:** No

### Additional Information

**Explanation for why data not available:** Pilot trial without opportunity for significant secondary data analyses
